# Supplementary material for: Electric-Field-Induced Phase Change in Copper Oxide Nanostructures
Source: PubMed Central journal article supplement — ACS Omega. 2021 Nov 22;6(48):33130–40. doi: 10.1021/acsomega.1c05498 (PMC8655937; doi:10.1021/acsomega.1c05498), 2021-11-22
Supplement: ao1c05498_si_001.pdf [file ao1c05498_si_001.pdf]

## Supporting Information

### Electric Field - Induced Phase Change in Copper Oxide Nanostructures

Tina Hesabizadeh<sup>1,†</sup>, Nessrine Jebari<sup>2,†</sup>, Ali Madouri<sup>2</sup>, Géraldine Hallais<sup>2</sup>, Trevor E. Clark<sup>3</sup>,  
Sanjay K. Behura<sup>4</sup>, Etienne Herth<sup>2</sup>, Grégory Guisbiers<sup>1,\*</sup>

<sup>1</sup>Department of Physics & Astronomy, University of Arkansas at Little Rock, 2801 South  
University Avenue, Little Rock, AR 72204, USA

<sup>2</sup>Center of Nanosciences & Nanotechnologies, CNRS UMR 9001, University of Paris-Saclay,  
Paris, 91120, France

<sup>3</sup>Materials Characterization Lab, Pennsylvania State University, N-317 Millennium Science  
Complex, Pollock Road, University Park, PA 16802, USA

<sup>4</sup>Department of Chemistry and Physics, University of Arkansas at Pine Bluff, 1200 N. University  
Drive, Pine Bluff, AR 71601, USA

†: Authors who contributed equally to this work

\*Corresponding author: [gxguisbiers@ualr.edu](mailto:gxguisbiers@ualr.edu)

#### **1. Copper oxides nanostructures by EFA-PLAL**

Copper (Cu) is a transition metal known to mankind since 9000 BC. Its name was derived from the Latin term “cuprum”, meaning “metal of Cyprus” because Cyprus, an island located in the Eastern Basin of the Mediterranean Sea, was a famous source of Cu at that time <sup>1</sup>. Nowadays, Chile, Peru, China, the Democratic Republic of Congo, and the United States are the world's largest

Cu producers. With the United States being the fifth largest Cu producer in the world, the production came close to an estimate of nearly 1.2 million metric tons in the year 2020 alone <sup>2</sup>. It is one of the most abundant metals on Earth. Cu is not a noble metal consequently; it gets easily oxidized into cupric oxide (CuO) or cuprous oxide (Cu<sub>2</sub>O).

In order to create CuO or Cu<sub>2</sub>O at the nanoscale, we used the EFA-PLAL protocol. As shown, on Figure S1, the EFA-PLAL protocol is very efficient to boost the concentration of Cu<sub>x</sub>O NSs compared to a regular PLAL protocol.

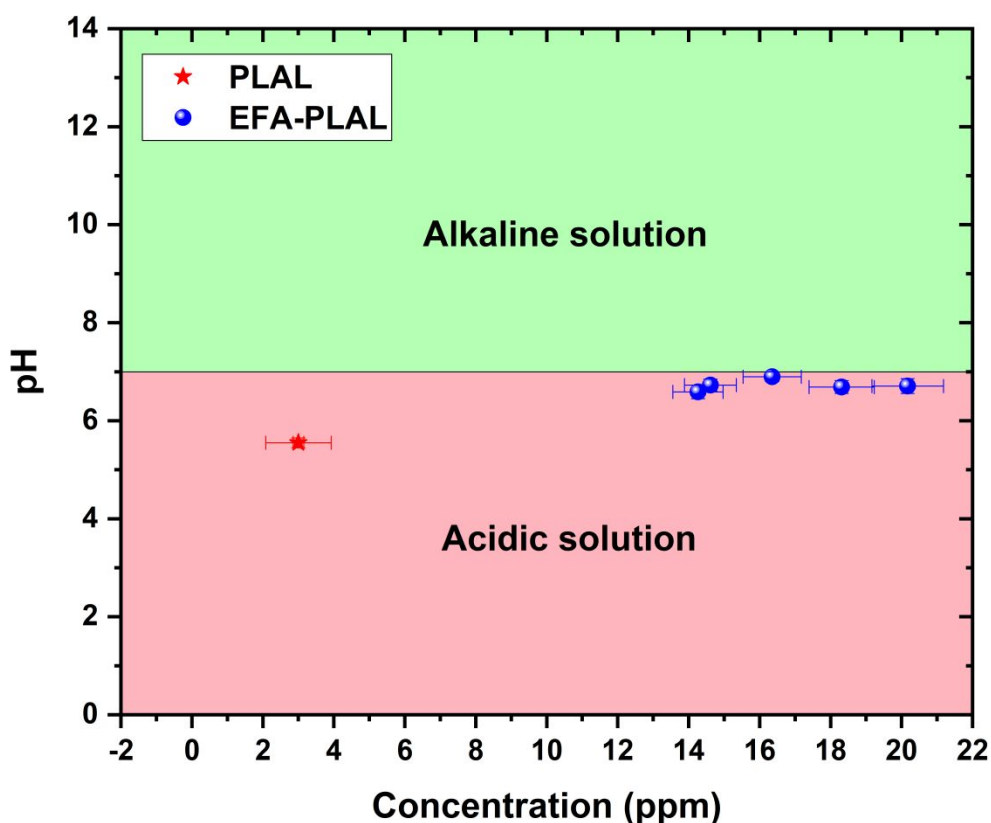

**Figure S1.** pH versus the concentration of the Cu<sub>x</sub>O NSs within the colloid.

## 2. SEM characterization

To perform SEM analysis, a droplet of the colloidal solution was deposited onto a silicon wafer and dried in an environmentally controlled glove box. Figure S2 shows some  $\text{Cu}_x\text{O}$  NSs observed under an SEM.

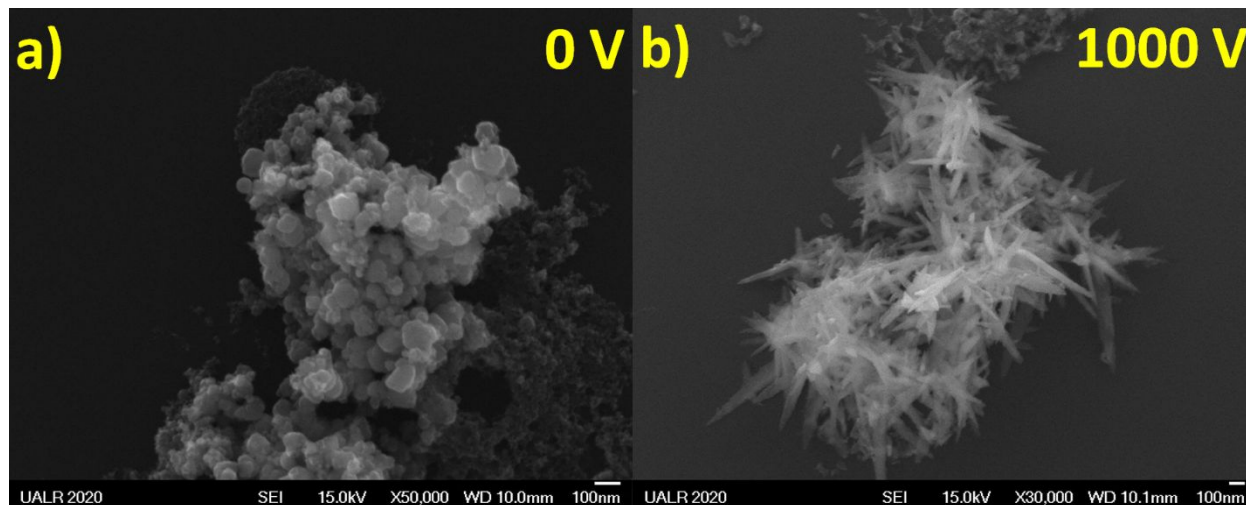

**Figure S2.** SEM images of the  $\text{Cu}_x\text{O}$  NSs synthesized by EFA-PLAL @ **a)** 0V and **b)** 1000V.

## References

1. <https://www.rsc.org/periodic-table/element/29/copper>.
2. Flanagan, D. M., Copper. *U.S. Geological Survey, Mineral Commodity Summaries* **2021**.
